# Supplementary material
Source: PubMed Central journal article supplement (PMC490019)

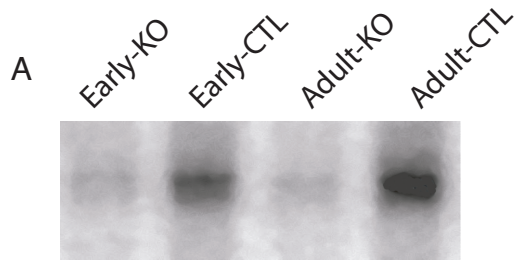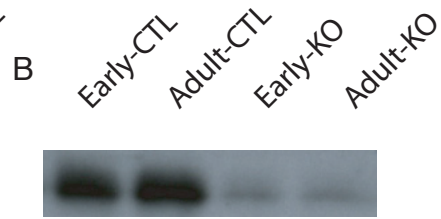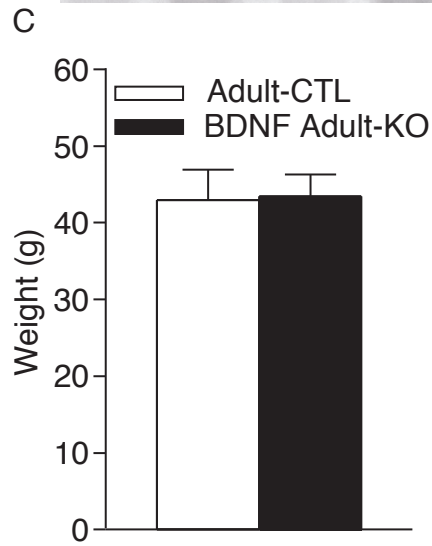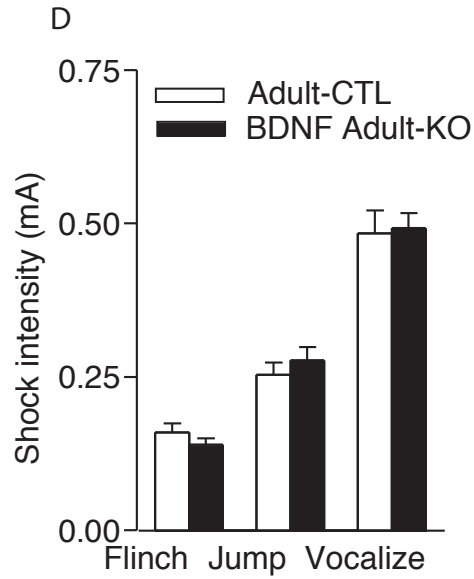

Supplement: pnas_101_29_10827__2.pdf [file pnas_101_29_10827__2.pdf]

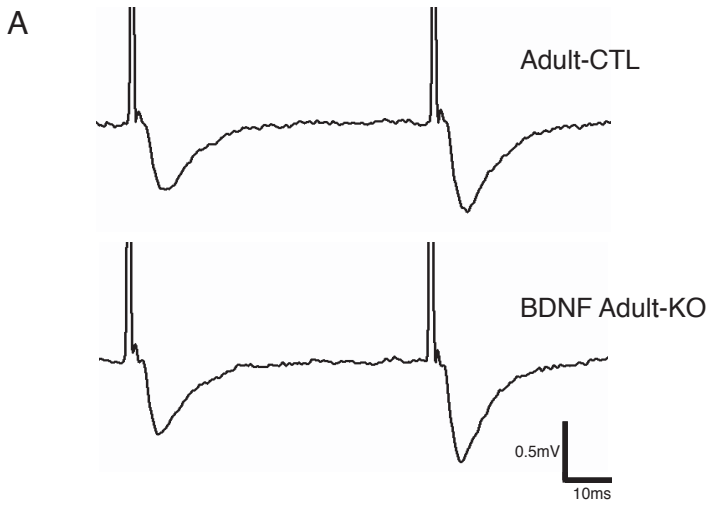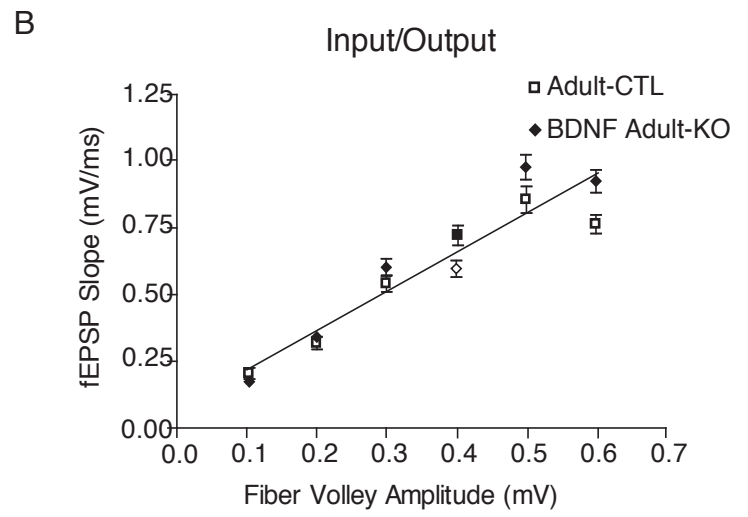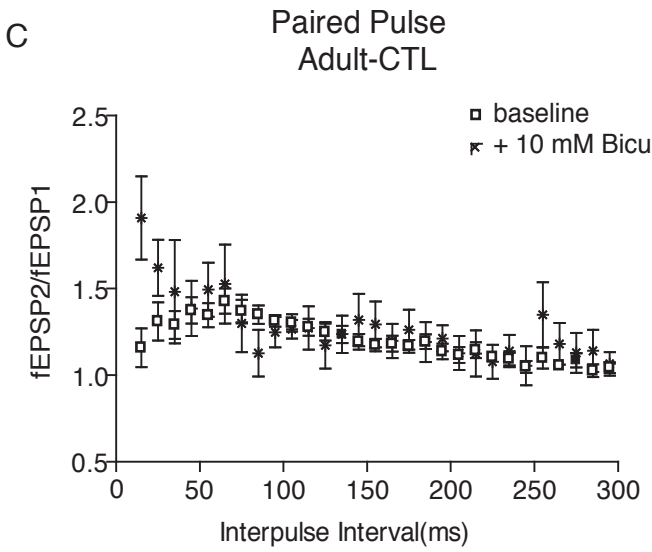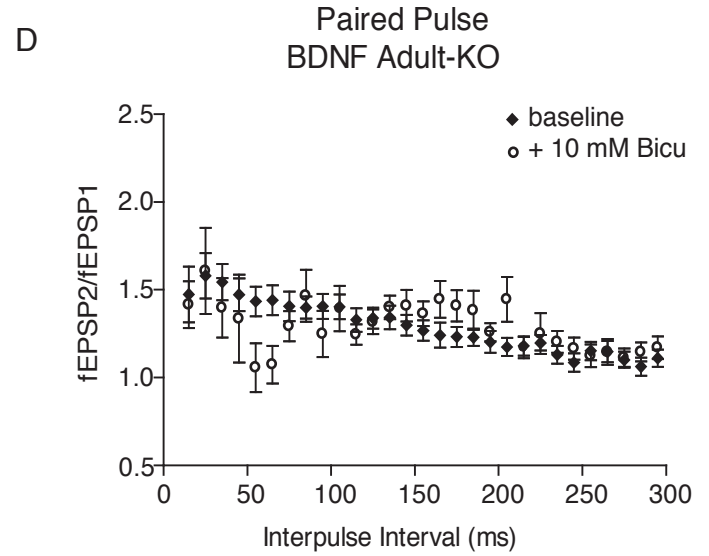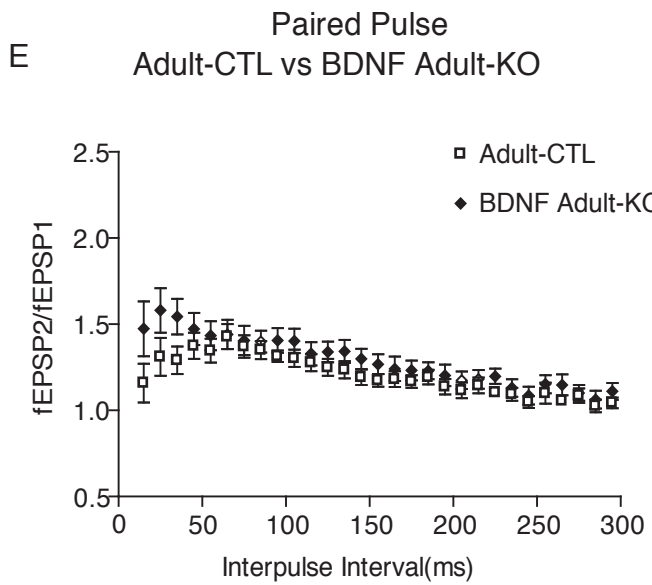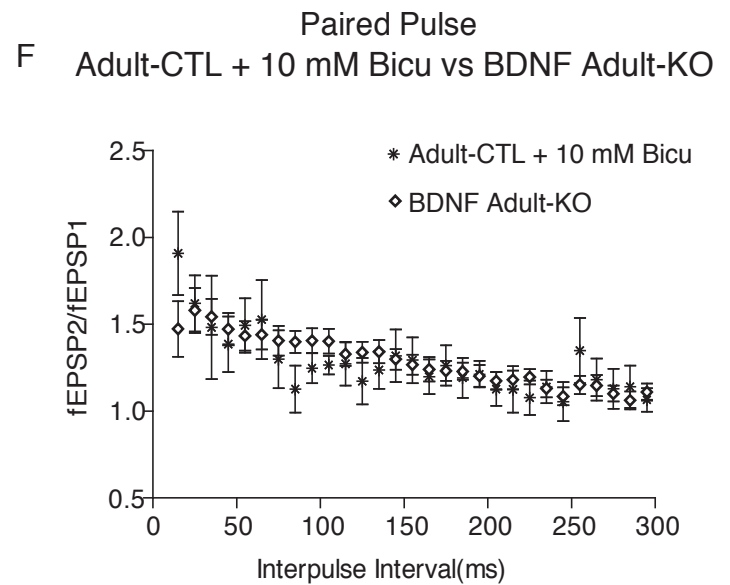

Supplement: pnas_101_29_10827__3.pdf [file pnas_101_29_10827__3.pdf]

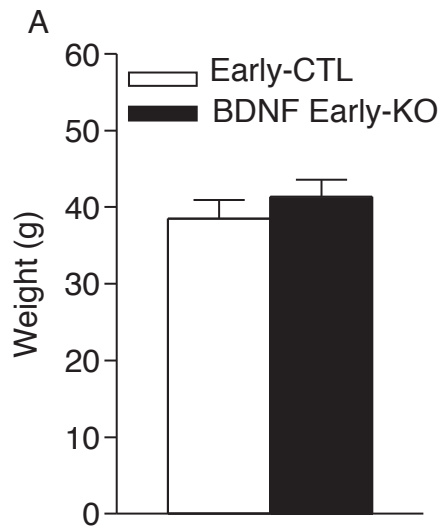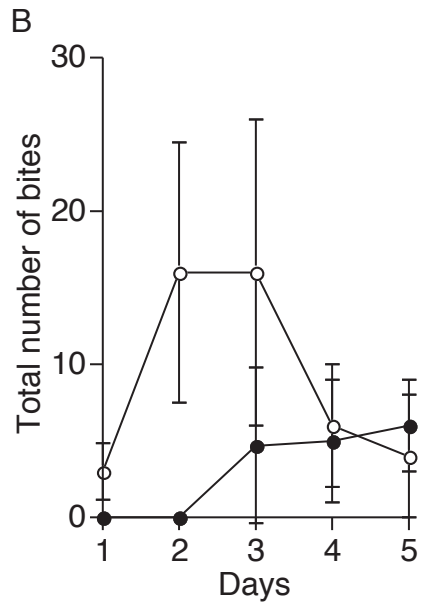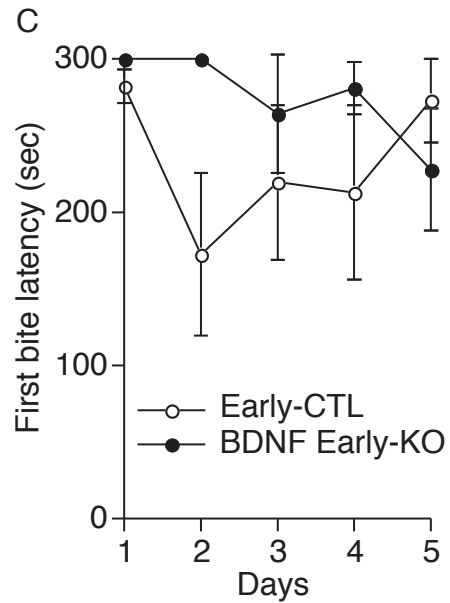

Supplement: pnas_101_29_10827__4.pdf [file pnas_101_29_10827__4.pdf]
